# Supplementary material for: The melatonin metabolite N1‐acetyl‐5‐methoxykynuramine facilitates long‐term object memory in young and aging mice
Source: PubMed Central journal article supplement (PMC7816253; doi:10.1111/jpi.12703), 2020-11-20

FIGURE S1

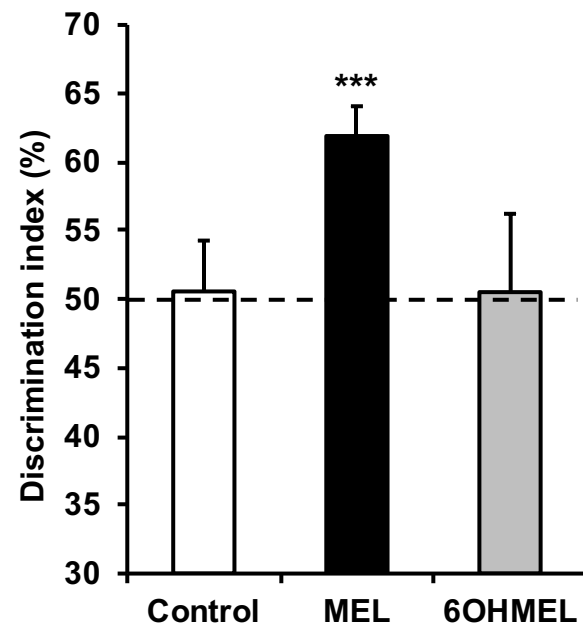

Supplement: JPI-70-e12703-s001.pdf [file JPI-70-e12703-s001.pdf]
